# Supplementary material for: Mycobiome Diversity in Traditionally Prepared Starters for Alcoholic Beverages in India by High-Throughput Sequencing Method
Source: Front Microbiol. 2019 Mar 5;10:348. doi: 10.3389/fmicb.2019.00348 (PMC6411702; doi:10.3389/fmicb.2019.00348)
Supplement: Table S1 — Table showing total number of 594 fungal species detected by HTS including common species (224), unique species (133) and rare-species (237), and their taxonomic affiliations in samples of chowan, dawdim, hamei, humao, khekhrii, and phut. Table also shows number of yeast species (6) detected by ITS-PCR, and yeast (18) and mold species (6) by PCR-DGGE in the same samples as reported earlier by Sha et al. (2018). [file Table_1.XLSX]

## Sheet: Sheet1
Phylum	Class	Order	Family	Common species =224 (Yeast=33; Molds=191)	Unique species = 133 (Yeasts =23; Molds =110)		Rare species in starters = 237 (Yeasts =27; Molds =210)					ITS-PCR (Sha et al., 2018)	PCR-DGGE (Sha et al., 2018)
						Chowan	Dawdim	Hamei	Humao	Khekhrii	Phut	Yeast species =6	Yeast species = 18
Ascomycota	Dothideomycetes	Capnodiales	Teratosphaeriaceae	Candida tropicalis	Acidomyces acidothermus	Candida californica, Candida catenulata, Candida dosseyi, Candida etchellsii, Candida haemulonis, Candida norvegica, Candida olivae, Candida pararugosa, Candida sake, Candida quercitrusa	Candida pararugosa, Candida sake	nil	Candida pararugosa	Candida haemulonis, Candida norvegica,	Candida norvegica, Candida olivae, Candida pararugosa, Candida sake, Candida quercitrusa	Wickerhamomyces anomalus	Saccharomyces cerevisiae
Ascomycota	Sordariomycetes	Hypocreales	Hypocreales_fam_Incertae_sedis	Aspergillus penicillioides	Acremonium charticola,Acremonium_charticola,Acremonium_stromaticum	Filobasidium magnum	nil	nil	nil	nil	nil	Pichia anomala	Saccharomycopsis fibuligera
Ascomycota	Dothideomycetes	Pleosporales	Pleosporaceae	Candida glabrata	Alternaria longissima	Mortierella capitata	nil	nil	nil	nil	nil	Saccharomycopsis fibuligera	Wickerhamomyces anomalus
Ascomycota	Sordariomycetes	Sordariomycetidae_ord_Incertae_sedis	Apiosporaceae	Saccharomycopsis malanga	Apiotrichum loubieri	Paecilomyces formosa	nil	nil	nil	nil	nil	Pichia terricola	Saccharomycopsis malanga
Ascomycota	Eurotiomycetes	Eurotiales	Trichocomaceae	Hyphopichia burtonii	Arthrinium phaeospermum,Arthrinium rasikravindrae	Cyphellophora suttonii	nil	nil	nil	nil	nil	Pichia kudriavzevii	Kluyveromyces marxianus
Ascomycota	Dothideomycetes	Dothideales	Dothioraceae	Rhizopus arrhizus	Aspergillus aculeatus,Aspergillus flavus,Aspergillus halophilicus,Aspergillus halophilicu,Aspergillus pseudotamarii,Aspergillus_terreus	Magnaporthe grisea	nil	nil	nil	nil	nil	Candida glabrata	Candida glabrata
Basidiomycota	Agaricomycetes	Auriculariales	Auriculariales_fam_Incertae_sedis	Kodamaea ohmeri	Aureobasidium melanogenum,Aureobasidium_namibiae	Acremonium persicinum	nil	Acremonium persicinum	Acremonium persicinum	nil	nil		Saccharomyces sp.
Ascomycota	Saccharomycetes	Saccharomycetales	Trichomonascaceae	Strelitziana malaysiana	Auricularia fuscosuccinea, Auricularia nigricans	Setophoma vernoniae	nil	nil	nil	nil	nil		Hyphopichia burtonii
Ascomycota	Leotiomycetes	Helotiales	Sclerotiniaceae	Auricularia delicata	Bulbithecium hyalosporum	Hannaella siamensis,Hannaella phetchabunensis	Hannaella phetchabunensis	Hannaella siamensis	nil	nil	nil		Schwanniomyces occidentalis
Ascomycota	Leotiomycetes	Helotiales	Helotiales_fam_Incertae_sedis	Monascus purpureus	Cadophora finlandica	Venturia asperata	nil	nil	nil	nil	nil		Pichia kudriavzevi
Ascomycota	Eurotiomycetes	Chaetothyriales	Chaetothyriaceae	Saccharomyces paradoxus	Camptophora hylomeconis	Millerozyma farinosa	nil	Metschnikowia pulcherrim	nil	nil	nil		Torulaspora delbrueckii
Ascomycota	Saccharomycetes	Saccharomycetales	Saccharomycetales_fam_Incertae_sedis	Botrytis caroliniana	Candida californica,Candida catenulata,Candida dosseyi, Candida etchellsii,Candida haemulonis,Candida norvegica,Candida polysorbophila,Candida quercitrus,Candida smithsonii,Candida stellimalicola,Candida stellimalicola,Candida xylopsoci,Candida yuanshanica	nil	Cortinarius torvus	nil	nil	nil	nil		Zygosaccharomyces bailii
Ascomycota	Pezizomycetes	Pezizales	Pezizales_fam_Incertae_sedis	Curvularia lunata	Cephaliophora tropica	nil	Ellisomyces anomalus	nil	nil	nil	nil		Pichia guilliermondii
Ascomycota	Dothideomycetes	Capnodiales	Davidiellaceae	Geosmithia pallida	Cladosporium dominicanum,Cladosporium halotolerans,Cladosporium_velox	nil	Phlebiopsis crassa	nil	nil	nil	nil		Candida parapsilosis
Basidiomycota	Agaricomycetes	Agaricales	Entolomataceae	Kluyveromyces marxianus	Clavispora lusitaniae	Mucor fragilis	Mucorardhlaengiktus	nil	Mucor racemosus,Mucor fragilis,Mucor ramosissimus	nil	nil		Komagataella pastoris
Ascomycota	Sordariomycetes	Hypocreales	Bionectriaceae	Simplicillium subtropicum	Clitopilus scyphoides	nil	Gliocladiopsis curvata	nil	nil	nil	nil		Saccharomycopsis capsularis
Basidiomycota	Agaricomycetes	Agaricales	Bolbitiaceae	Wickerhamomyces anomalus	Cortinarius torvus	nil	Talaromyces luteus	nil	nil	nil	Talaromyces luteus		Saccharomyces paradoxus
Basidiomycota	Agaricomycetes	Agaricales	Cortinariaceae	Talaromyces luteus	Cryptococcus heimaeyensis	nil	nil	Camptophorahylomeconis	nil	nil	nil		Candida tropicalis
Basidiomycota	Tremellomycetes	Tremellales	Tremellales_fam_Incertae_sedis	Candida humilis	Cutaneotrichosporon terricola	nil	nil	Cutaneotrichosporon terricola	nil	nil	nil		Mold species =6
Ascomycota	Dothideomycetes	Pleosporales	Pleosporaceae	Tetracladium setigerum	Cyberlindnera jadinii	nil	nil	Epicoccum nigrum	nil	nil	nil		Aspergillus penicillioides
Basidiomycota	Tremellomycetes	Trichosporonales	Trichosporonaceae	Curvularia clavata	Cyphellophora suttonii	nil	nil	Eupenidiella venezuelensis	nil	nil	nil		Rhizopus oryzae
Ascomycota	Saccharomycetes	Saccharomycetales	Saccharomycetales_fam_Incertae_sedis	Rhizopus microsporus	Cystofilobasidium infirmominiatum	nil	Fusarium albosuccineum	Fusarium albosuccineum, Fusarium albosuccineum, Fusarium keratoplasticum, Fusarium nelsonii, Fusarium nelsonii, Fusarium oxysporum, Fusarium penzigii	nil	Fusarium penzigii	nil		Mucoromycotina
Ascomycota	Eurotiomycetes	Chaetothyriales	Chaetothyriaceae	Dipodascus geotrichum	Dipodascus australiensis	nil	nil	Lachnum virgineum	nil	nil	nil		Aspergillus oryzae
Basidiomycota	Tremellomycetes	Cystofilobasidiales	Cystofilobasidiaceae	Fusicolla acetilerea	Ellisomyces anomalus	nil	nil	Neoceratosperma yunnanensis	nil	nil	nil		Mucor circinelloides
Zygomycota	Mucoromycotina_cls_Incertae_sedis	Mucorales	Mucoraceae	Gibberella intricans	Epicoccum nigrum	nil	nil	Papiliotrema aure,Papiliotrema flavescens	Papiliotrema aure,Papiliotrema flavescen,Papiliotrema terrestris	nil	Papiliotrema terrestris		Aureobasidium pullulans
Ascomycota	Dothideomycetes	Pleosporales	Pleosporaceae	Verticillium leptobactrum	Eupenidiella venezuelensis	nil	nil	Paracamarosporium fagi	nil	nil	nil
Ascomycota	Dothideomycetes	Capnodiales	Teratosphaeriaceae	Wickerhamomyces sydowiorum	Exophiala castellanii	nil	Penicillium oxalicum	Penicillium astrolabium, Penicillium_aurantiogriseum, Penicillium brevicompactum, Penicillium halotolerans	nil	Penicillium brevicompactum, Penicillium halotolerans, Penicillium oxalicum, Penicillium sclerotiorum	nil
Ascomycota	Eurotiomycetes	Chaetothyriales	Herpotrichiellaceae	Cladosporium halotolerans	Fellhanera bouteillei	nil	nil	Pseudocercospora stephanandrae	nil	nil	nil
Basidiomycota	Tremellomycetes	Filobasidiales	Filobasidiaceae	Candida orthopsilosis	Filobasidium magnum	nil	nil	Sporobolomyces bannaensis	nil	nil	nil
Basidiomycota	Agaricomycetes	Agaricales	Niaceae	Trichosporon asahii	Fusarium albosuccineum,Fusarium delphinoidesFusarium keratoplasticum,Fusarium solani	nil	nil	Trichomerium dioscoreae	nil	nil	nil
Ascomycota	Sordariomycetes	Hypocreales	Nectriaceae	Candida metapsilosis	Ganoderma enigmaticum	nil	nil	Truncospora macrospora	nil	nil	nil
Basidiomycota	Agaricomycetes	Polyporales	Ganodermataceae	Bipolaris oryzae	Gilbertella persicaria	nil	nil	Wallemia hederae,Wallemia muriae	Wallemia muriae	nil	Wallemia sebi
Basidiomycota	Agaricomycetes	Geastrales	Geastraceae	Trichomonascus ciferrii	Gliocladiopsis_curvata	Arthrinium phaeospermum	nil	Arthrinium rasikravindrae,Arthrinium phaeospermum	nil	nil	nil
Ascomycota	Sordariomycetes	Hypocreales	Hypocreales_fam_Incertae_sedis	Chlorophyllum globosum	Hannaella phetchabunensis,Hannaella siamensis	Cladosporium dominicanum	Cladosporium langeronii	Cladosporium flabelliforme, Cladosporium langeronii, Cladosporium velox	Cladosporium dominicanum	Cladosporium langeronii	nil
Zygomycota	Mucoromycotina_cls_Incertae_sedis	Mucorales	Choanephoraceae	Malassezia restricta	Hannaellan siamensis	nil	nil	Cryptococcus nemorosus,Cryptococcus heimaeyensis	nil	nil	Cryptococcus heimaeyensis
Ascomycota	Sordariomycetes	Hypocreales	Nectriaceae	Candida intermedia	Inocybe straminipes	nil	nil	Phoma omnivirens	nil	nil	nil
Ascomycota	Eurotiomycetes	Onygenales	Gymnoascaceae	Aspergillus clavatus	Kwoniella mheveanensis	nil	nil	Pseudocercosporella chaenomelis	nil	nil	nil
Basidiomycota	Agaricomycetes	Agaricales	Omphalotaceae	Blastobotrys proliferans	Lachnum virgineum	nil	nil	Wallrothiella subiculosa	nil	nil	nil
Basidiomycota	Tremellomycetes	Tremellales	Tremellales_fam_Incertae_sedis	Blastobotrys adeninivorans	Lasiodiplodia pyriformis	nil	Kwoniella heveanensis	Kwoniella heveanensis	nil	nil	nil
Basidiomycota	Agaricomycetes	Agaricales	Hygrophoraceae	Aspergillus lentulus	Magnaporthe grisea	nil	Aureobasidium melanogenum	Aureobasidium melanogenum,Aureobasidium namibiae	nil	nil	nil
Basidiomycota	Agaricomycetes	Agaricales	Inocybaceae	Gymnopilus ochraceus	Marasmius haematocephalus	nil	nil	Gilbertella persicaria	nil	nil	nil
Ascomycota	Saccharomycetes	Saccharomycetales	Saccharomycetaceae	Candida sake	Metarhizium carneum,Mortierella capitata	nil	nil	nil	Alternaria longissima	nil	nil
Ascomycota	Pezizomycotina_cls_Incertae_sedis	Pezizomycotina_ord_Incertae_sedis	Pezizomycotina_fam_Incertae_sedis	Coprinellus radians	Metschnikowia pulcherrima,Metschnikowia bicuspidata	nil	nil	nil	Cadophora finlandica	nil	nil
Basidiomycota	Tremellomycetes	Tremellales	Tremellales_fam_Incertae_sedis	Agaricus sodalis	Moniliellam pollinis	nil	nil	Curvularia hawaiiensis	Curvularia hawaiiensis,Curvularia verruculosa	nil	Curvularia hawaiiensis, Curvularia alcornii
Ascomycota	Leotiomycetes	Helotiales	Hyaloscyphaceae	Marasmius haematocephalus	Mortierella capitata	nil	nil	nil	Exophiala castellanii	nil	nil
Ascomycota	Dothideomycetes	Botryosphaeriales	Botryosphaeriaceae	Candida membranifaciens	Mucor ardhlaengiktus,Mucor racemosus, Mucor velutinosus	nil	nil	nil	Gymnopus gibbosus	nil	nil
Ascomycota	Sordariomycetes	Magnaporthales	Magnaporthaceae	Aspergillus sydowii	Neoceratosperma yunnanensis	nil	nil	nil	Inocybe straminipes	nil	nil
Basidiomycota	Ustilaginomycotina_cls_Incertae_sedis	Malasseziales	Malasseziaceae	Wallemia muriae	Nigrospora oryzae	nil	nil	nil	Metarhizium carneum	nil	nil
Basidiomycota	Agaricomycetes	Agaricales	Marasmiaceae	Candida albicans	Paecilomyces formosa	nil	nil	nil	Peziculaalnicola	nil	nil
Ascomycota	Sordariomycetes	Hypocreales	Clavicipitaceae	Alternaria arborescens	Papiliotrema aurea,Papiliotrema flavescens,Papiliotrema laurentii,Papiliotrema pseudoalba,Papiliotrema terrestris	nil	nil	nil	Phialocephala fortinii	nil	nil
Ascomycota	Saccharomycetes	Saccharomycetales	Metschnikowiaceae	Cladosporium haerospermum	Paracamarosporium fagi	nil	nil	nil	Saccharomycopsis lassenensis	nil	nil
Ascomycota	Saccharomycetes	Saccharomycetales	Debaryomycetaceae	Trichoderma asperellum	Paraphoma chrysanthemicola	nil	nil	nil	Sarocladiumini ficis	nil	nil
Ascomycota	Eurotiomycetes	Eurotiomycetidae_ord_Incertae_sedis	Monascaceae	Candida olivae	Penicillium astrolabiumPenicillium astrolabium,Penicillium aurantiogriseum, Penicillium halotolerans, Penicillium herquei, Penicillium oxalicum, Penicillium oxalicum, Penicillium oxalicum, Penicillium oxalicum, Penicillium steckii, Penicillium sumatraense	nil	nil	nil	Solicoccozyma terrea	nil	nil
Zygomycota	Mortierellomycotina_cls_Incertae_sedis	Mortierellales	Mortierellaceae	Penicillium aethiopicum	Pezicula alnicola	Kazachstania pintolopesii	nil	nil	Kazachstania pintolopesii	nil	nil
Zygomycota	Mucoromycotina_cls_Incertae_sedis	Mucorales	Mucoraceae	Rhodotorula mucilaginosa	Phaeosphaeria podocarpi	nil	Saccharomyces cerevisiae, s, Saccharomyces kudriavzevii	nil	Saccharomyces cerevisiae, Saccharomyces eubayanus, Saccharomyces kudriavzevii	nil	nil
Ascomycota	Dothideomycetes	Pleosporales	Pleosporales_fam_Incertae_sedis	Gibberella tricincta	Phialocephala fortinii	nil	nil	Malassezia globosa	Malassezia globosa	nil	nil
Ascomycota	Saccharomycetes	Saccharomycetales	Saccharomycetaceae	Sarocladium oryzae	Phlebiopsis crassa	nil	nil	nil	Podospora intestinacea	nil	nil
Ascomycota	Dothideomycetes	Capnodiales	Mycosphaerellaceae	Debaryomyces hansenii	Phoma multirostrata,Phoma omnivirens	nil	nil	nil	nil	Cystofilobasidium infirmominiatum,Cystofilobasidiummacerans	nil
Ascomycota	Eurotiomycetes	Eurotiales	Trichocomaceae	Aspergillus niger	Pichia fermentans,Pichia mandshurica,Pichia membranifaciens	nil	nil	nil	nil	Lasiodiplodiapyriformis	nil
Basidiomycota	Tremellomycetes	Tremellales	Tremellales_fam_Incertae_sedis	Gibberella fujikuroi	Pseudocercosporella chaenomelis	nil	nil	nil	nil	Paraphomachrysanthemicola	nil
Ascomycota	Dothideomycetes	Pleosporales	Montagnulaceae	Candida parapsilosis	Rhizophlyctis rosea	nil	nil	nil	nil	Rhodotorula dairenensis	Rhodotorula babjevae
Ascomycota	Dothideomycetes	Pleosporales	Pleosporales_fam_Incertae_sedis	Psathyrella candolleana	Rhodotorula babjevae,Rhodotorula dairenensis	nil	nil	nil	nil	Termitomyces microcarpus	nil
Ascomycota	Eurotiomycetes	Eurotiales	Trichocomaceae	Ganoderma enigmaticum	Saccharomyces eubayanus,Saccharomyces kudriavzevii,Saccharomyces mikatae	Auricularia fuscosuccinea	nil	Auricularia nigricans,Auricularia fuscosuccinea	nil	Auricularia nigricans,Auricularia fuscosuccinea	nil
Ascomycota	Sordariomycetes	Xylariales	Amphisphaeriaceae	Aspergillus terreus	Saccharomycopsis lassenensis	nil	nil	nil	nil	Cyberlindnera jadinii	nil
Ascomycota	Leotiomycetes	Helotiales	Dermateaceae	Termitomyces heimii	Sakaguchia lamellibrachiae	nil	nil	Volvariellamurinella	nil	Volvariella murinella	nil
Ascomycota	Leotiomycetes	Helotiales	Vibrisseaceae	Rhynchogastrema complexa	Sarocladiu minificis	nil	nil	nil	nil	Pestalotiopsis trachicarpicola	nil
Basidiomycota	Agaricomycetes	Polyporales	Phanerochaetaceae	Candida blankii	Schizophyllum commune	Marasmius oreades	Marasmius oreades	nil	nil	Marasmius oreades	nil
Ascomycota	Dothideomycetes	Pleosporales	Pleosporales_fam_Incertae_sedis	Gymnopus gibbosus	Setophoma vernoniae	Geastrum pectinatum	Geastrum kotlabae	Geastrum kotlabae	nil	Geastrum kotlabae	Geastrum kotlabae
Ascomycota	Lecanoromycetes	Teloschistales	Physciaceae	Mucor indicus	Solicoccozyma terrea	Gymnoascus reessii	nil	nil	nil	Gymnoascus reessii	nil
Ascomycota	Saccharomycetes	Saccharomycetales	Pichiaceae	Geastrum pectinatum	Sordaria fimicola	nil	nil	Aspergillus gracilis	nil	Aspergillus neoniveus	nil
Ascomycota	Sordariomycetes	Sordariales	Lasiosphaeriaceae	Fusarium fujikuroi	Stachybotrys elegans	nil	nil	Ganoderma enigmaticum	nil	Ganoderma enigmaticum	nil
Ascomycota	Dothideomycetes	Capnodiales	Mycosphaerellaceae	Aureobasidium pullulans	Sterigmatomyces halophilus	nil	nil	nil	nil	nil	Blastobotrys terrestris
Ascomycota	Dothideomycetes	Capnodiales	Mycosphaerellaceae	Wallemia mellicola	Talaromyces wortmannii	nil	nil	nil	nil	nil	Conocybe velutipes
Basidiomycota	Exobasidiomycetes	Microstromatales	Quambalariaceae	Meyerozyma caribbica	Termitomyces microcarpus	nil	nil	nil	nil	nil	Flagelloscypha minutissima
Chytridiomycota	Chytridiomycetes	Rhizophlyctidales	Rhizophlyctidaceae	Physciella chloantha	Tetracladium setigerum	nil	nil	nil	nil	nil	Hygrocybe conicoides
Basidiomycota	Microbotryomycetes	Sporidiobolales	Sporidiobolales_fam_Incertae_sedis	Curvularia alcornii	Thermomyces lanuginosus	nil	nil	nil	nil	nil	Knufia peltigerae
Ascomycota	Saccharomycetes	Saccharomycetales	Saccharomycetaceae	Sterigmatomyces elviae	Trichomerium dioscoreae	nil	nil	nil	nil	nil	Mycocentro spora
Ascomycota	Saccharomycetes	Saccharomycetales	Saccharomycopsidaceae	Fusarium albosuccineum	Truncospora macrospora	nil	nil	nil	nil	nil	Naumovozyma castellii
Basidiomycota	Cystobasidiomycetes	Cystobasidiomycetes_ord_Incertae_sedis	Cystobasidiomycetes_fam_Incertae_sedis	Penicillium oxalicum	Venturia asperata	nil	nil	nil	nil	nil	Rhizophlyctis rosea
Ascomycota	Saccharomycetes	Saccharomycetales	Dipodascaceae	Cladosporium langeronii	Verticillium leptobactrum	nil	nil	nil	nil	nil	Sakaguchia lamellibrachiae
Ascomycota	Sordariomycetes	Hypocreales	Hypocreales_fam_Incertae_sedis	Curvularia tuberculata	Wallemia hederae	Sterigmatomyces_elviae	nil	nil	nil	nil	Sterigmatomyce elviae,Sterigmatomyceshalophilus
Basidiomycota	Agaricomycetes	Agaricales	Schizophyllaceae	Aspergillus tritici	Wallemia sebi	nil	nil	nil	nil	nil	Strelitziana malaysiana
Ascomycota	Pezizomycotina_cls_Incertae_sedis	Pezizomycotina_ord_Incertae_sedis	Pezizomycotina_fam_Incertae_sedis	Candida sojae	Wallrothiella subiculosa	nil	nil	nil	nil	nil	Tetracladium setigerum
Ascomycota	Sordariomycetes	Hypocreales	Cordycipitaceae	Penicillium sclerotiorum	Wickerhamomyces sydowiorum	nil	nil	nil	nil	nil	Verticillium leptobactrum
Basidiomycota	Tremellomycetes	Filobasidiales	Piskurozymaceae	Marasmius oreades	Xerochrysium dermatitidis	nil	nil	nil	nil	nil	Wickerhamomyces sydowiorum
Basidiomycota	Microbotryomycetes	Sporidiobolales	Sporidiobolales_fam_Incertae_sedis	Pestalotiopsis trachicarpicola	Yamadazyma triangularis	Millerozyma farinosa	nil	nil	nil	nil	Millerozyma farinosa
Basidiomycota	Agaricostilbomycetes	Agaricostilbales	Agaricostilbaceae	Aspergillus restrictus		Sarocladium oryzae	nil	nil	nil	nil	Sarocladium inificis
Ascomycota	Eurotiomycetes	Chaetothyriales	Chaetothyriales_fam_Incertae_sedis	Penicillium brevicompactum		nil	Xerochrysium dermatitidis	Xerochrysium dermatitidis	nil	nil	Xerochrysium dermatitidis
Ascomycota	Eurotiomycetes	Eurotiales	Trichocomaceae	Aspergillus candidus		nil	nil	Clonostachys rosea	nil	nil	Clonostachys rosea
Basidiomycota	Agaricomycetes	Agaricales	Lyophyllaceae	Volvariella murinella		nil	nil	nil	nil	Botrytis caroliniana	Botrytis caroliniana
Ascomycota	Leotiomycetes	Helotiales	Helotiales_fam_Incertae_sedis	Aspergillus nidulans		Botrytis caroliniana	nil	nil	nil	Clitopilus scyphoides	Clitopilus scyphoides
Ascomycota	Sordariomycetes	Hypocreales	Hypocreaceae	Geastrum kotlabae		nil	nil	nil	nil	nil	Quambalaria simpsonii
Ascomycota	Dothideomycetes	Capnodiales	Capnodiaceae	Penicillium cinnamopurpureum		nil	nil	nil	nil	nil	Trichoderma longibrachiatum
Ascomycota	Saccharomycetes	Saccharomycetales	Trichomonascaceae	Millerozyma farinosa		Geosmithia pallida	nil	nil	nil	nil	Geosmithia pallida
Basidiomycota	Agaricomycetes	Polyporales	Polyporaceae	Blastobotrys terrestris		Schizophyllum commune	Schizophyllum commune	nil	nil	nil	Schizophyllum commune
Ascomycota	Dothideomycetes	Venturiales	Venturiaceae	Cyberlindnera jadinii		nil	nil	nil	nil	nil	Simplicillium subtropicum
Ascomycota	Sordariomycetes	Hypocreomycetidae_ord_Incertae_sedis	Plectosphaerellaceae	Auricularia nigricans		nil	nil	Acidomyces acidothermus	Simplicillium subtropicum	Acidomyces acidothermus	Acidomyces acidothermus
Basidiomycota	Agaricomycetes	Agaricales	Pluteaceae	Auricularia fuscosuccinea		Yarrowia lipolytica	Yarrowia lipolytica	Yarrowia lipolytica	nil	Yarrowia lipolytica	Yarrowia lipolytica
Basidiomycota	Wallemiomycetes	Wallemiales	Wallemiaceae	Rhodotorula dairenensis		nil	nil	nil	nil	nil	Yamadazyma triangularis
Ascomycota	Sordariomycetes	Coniochaetales	Coniochaetales_fam_Incertae_sedis	Termitomyces microcarpus		nil	nil	nil	Monascus purpureus	nil	Monascus purpureus
Ascomycota	Saccharomycetes	Saccharomycetales	Saccharomycetales_fam_Incertae_sedis	Fusarium solani		nil	nil	Cephaliophora tropica	nil	nil	Cephaliophora tropica
Ascomycota	Eurotiomycetes	Eurotiales	Trichocomaceae	Aspergillus pseudotamarii		Pichia kluyveri	Pichia fermentans	Pichia kluyveri	nil	Pichia kluyveri	Pichia kluyveri,Pichia fermentans
Ascomycota	Saccharomycetes	Saccharomycetales	Pichiaceae	Candida etchellsii		Physciella chloantha	Physciella chloantha	Physciella chloantha	nil	Physciella chloantha	Physciella chloantha
Ascomycota	Saccharomycetes	Saccharomycetales	Saccharomycetales_fam_Incertae_sedis	Cystofilobasidium infirmominiatum		Trichomonascus ciferrii	Trichomonascus ciferrii	Trichomonascusciferrii	nil	nil	Trichomonascus ciferrii
				Cystofilobasidium macerans		nil	nil	nil	nil	nil	Saprochaetesuaveolens
				Lasiodiplodia pyriformis
				Paraphoma chrysanthemicola
				Penicillium aurantiogriseum
				Aspergillus halophilicus
				Saccharomyces mikatae
				Mucor ardhlaengiktus
				Saccharomyces kudriavzevii
				Wallemia hederae
				Yarrowia lipolytica
				Candida pararugosa
				Lasiodiplodia crassispora
				Candidaencermartinsiae
				Pichia kluyveri
				Saprochaete suaveolens
				Echinoderma echinaceum
				Conocybe velutipes
				Cryptococcus aerius
				Curvularia verruculosa
				Mucor ramosissimus
				Saccharomyces eubayanus
				Podospora intestinacea
				Aspergillus neoniveus
				Mucor circinelloides
				Pyrenochaetopsis leptospora
				Papiliotrema flavescens
				Quambalaria simpsonii
				Malassezia globosa
				Saccharomyces cerevisiae
				Kazachstania pintolopesii
				Acremonium persicinum
				Alternaria longissima
				Flagelloscypha minutissima
				Cadophora finlandica
				Candida silvicultrix
				Cladosporium flabelliforme
				Curvularia hawaiiensis
				Exophiala castellanii
				Trichoderma longibrachiatum
				Gymnoascus reessii
				Inocybe straminipes
				Metarhizium carneum
				Hygrocybe conicoides
				Mucor fragilis
				Papiliotrema aurea
				Papiliotrema laurentii
				Pezicula alnicola
				Phialocephala fortinii
				Saccharomycopsis lassenensis
				Sarocladiuminificis
				Solicoccozyma terrea
				Aspergillus bombycis
				Aspergillus gracilis
				Aspergillus aculeatus
				Moniliella pollinis
				Sordaria fimicola
				Lodderomyces elongisporus
				Stachybotrys elegans
				Colletotrichum musae
				Cryptococcus flavus
				Clonostachys miodochialis
				Cutaneotrichosporon jirovecii
				Knufia peltigerae
				Phaeosphaeria podocarpi
				Acremonium stromaticum
				Aspergillus pseudonomius
				Penicillium steckii
				Phoma multirostrata
				Fellhanera bouteillei
				Fusarium keratoplasticum
				Arthrinium rasikravindrae
				Cladosporium velox
				Aureobasidium melanogenum
				Penicillium astrolabium
				Fusarium delphinoides
				Gilbertella persicaria
				Hannaella phetchabunensis
				Aureobasidium namibiae
				Kwoniella heveanensis
				Cladosporium dominicanum
				Cryptococcus heimaeyensis
				Cryptococcus nemorosus
				Fusarium nelsonii
				Penicillium citrinum
				Fusarium penzigii
				Trichosporon insectorum
				Penicillium sumatraense
				Phoma omnivirens
				Mycocentrospora
				Pseudocercosporella chaenomelis
				Wallrothiella subiculosa
				Arthrinium phaeospermum
				Acremonium charticola
				Camptophora hylomeconis
				Cutaneotrichosporon terricola
				Epicoccum nigrum
				Eupenidiella venezuelensis
				Fusarium oxysporum
				Lachnum virgineum
				Cladosporium delicatulum
				Neoceratosperma yunnanensis
				Papiliotrema pseudoalba
				Paracamarosporium fagi
				Penicillium herquei
				Naumovozyma castellii
				Pseudocercospora stephanandrae
				Sporobolomyces bannaensis
				Trichomerium dioscoreae
				Truncospora macrospora
				Wallemia sebi
				Mucor velutinosus
				Talaromyces wortmannii
				Gliocladiopsis curvata
				Candida norvegica
				Mucor racemosus
				Pichia membranifaciens
				Clonostachys rosea
				Cortinarius torvus
				Ellisomyces anomalus
				Phlebiopsis crassa
